## CORRESPONDENCE

Anesthesiology  
1999; 91:588  
© 1999 American Society of Anesthesiologists, Inc.  
Lippincott Williams & Wilkins, Inc.

*In Reply:*—We thank Drs. Donati and Plaud for pointing out the error in figure 2 in our published study.<sup>1</sup> Unfortunately, this calculation error not only escaped our attention, but also the attention of the reviewers. However, this error does not change our conclusions. The isobolographic analysis still demonstrates a synergistic interaction with respect to the neuromuscular blocking activity of the rocuronium and cisatracurium combination (fig. 1). The experimentally determined ED<sub>50</sub> (and 95% confidence interval) for the combination was 36.8 (35–38) μg/kg for rocuronium and 8.7 (8.3–9.1) μg/kg for cisatracurium. The theoretic additive ED<sub>50</sub> (and 95% confidence interval) was calculated to be 55.5 (53.3–57.7) μg/kg for rocuronium and 13.1 (12.6–13.6) μg/kg for cisatracurium. The confidence intervals of these points do not overlap, and the results of a Student *t* test for potency ratio were significant ( $P < 0.001$ ), indicating synergism. The fractional (algebraic) analysis of this interaction still demonstrates synergism (table 1).

**Mohamed Naguib, M.B., B.Ch., M.S.C., F.F.A.R.C.S.I., M.D.**  
Professor of Anesthesiology  
Department of Anaesthesiology  
King Khalid University Hospital  
Riyadh, Saudi Arabia  
naguib01@ksu.edu.sa

## Reference

1. Naguib M, Samarkandi AH, Ammar A, Elfaqih SR, Al-Zahrani S, Turkistani A: Comparative clinical pharmacology of rocuronium, cisatracurium, and their combination. *ANESTHESIOLOGY* 1998; 89:1116–24

(Accepted for publication March 31, 1999.)

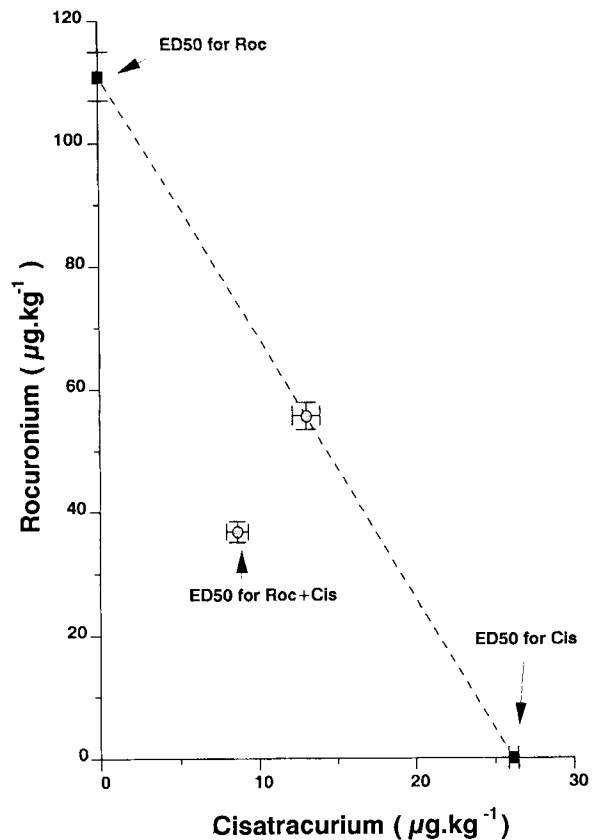

**Fig. 1.** First-twitch ED<sub>50</sub> isobologram for the interaction of rocuronium and cisatracurium. The dashed line connecting the single-drug ED<sub>50</sub> points is the theoretical additive line, and the point on this line is the theoretical additive ED<sub>50</sub> point (95% confidence interval). The experimentally determined ED<sub>50</sub> dose (95% confidence interval) of the rocuronium–cisatracurium combination decreased significantly ( $P < 0.001$ ) below the corresponding theoretical additive point, indicating synergistic interaction.

**Table 1.** ED<sub>50</sub> Values and 95% CI for Rocuronium and Cisatracurium Administered Alone and in Combination in a Fixed-dose Ratio

| Group         | Rocuronium Component         |               | Cisatracurium Component      |                  | Sum of ED <sub>50</sub> Fractions |
|---------------|------------------------------|---------------|------------------------------|------------------|-----------------------------------|
|               | Fraction of ED <sub>50</sub> | Dose (μg/kg)  | Fraction of ED <sub>50</sub> | Dose (μg/kg)     |                                   |
| Rocuronium    | 1.00                         | 111 (107–115) | —                            | —                | 1.00                              |
| Cisatracurium | —                            | —             | 1.00                         | 26.2 (25.8–26.5) | 1.00                              |
| Combination   | 0.33                         | 36.8 (35–38)  | 0.33                         | 8.7 (8.3–9.1)    | 0.66                              |
